# Supplementary material
Source: PubMed Central journal article supplement (PMC5581702)
Supplement: NIHMS889261-supplement-2.pdf [file NIHMS889261-supplement-2.pdf]

**TABLE 1**

| <b>Penn Sample ID</b> | <b>A3A expression relative to cyclophilin (log 10)</b> | <b>Group</b> |
|-----------------------|--------------------------------------------------------|--------------|
| S2461                 | 0.000611598                                            | low APOBEC3A |
| S323                  | 0.001926293                                            | low APOBEC3A |
| S2258                 | 0.002301022                                            | low APOBEC3A |
| S2613                 | 0.00255424                                             | low APOBEC3A |
| S428                  | 0.004574909                                            | low APOBEC3A |
| S362                  | 0.007079403                                            | low APOBEC3A |
| S197                  | 0.007409273                                            | low APOBEC3A |
| S895                  | 0.007823963                                            | low APOBEC3A |
| S1658                 | 0.008065984                                            | low APOBEC3A |
| S1737                 | 0.010164617                                            | low APOBEC3A |
| S1108                 | 0.010308271                                            | low APOBEC3A |
| S651                  | 0.010371989                                            | low APOBEC3A |
| S2753                 | 0.011319051                                            | low APOBEC3A |
| S1756                 | 0.011691269                                            | low APOBEC3A |
| S786                  | 0.014790284                                            | low APOBEC3A |
| S997                  | 0.015564591                                            | low APOBEC3A |
| S1094                 | 0.017301962                                            | low APOBEC3A |
| S519                  | 0.018158313                                            | low APOBEC3A |
| S761                  | 0.019663723                                            | low APOBEC3A |
| S2711                 | 0.022035735                                            | low APOBEC3A |
| S2248                 | 0.025165841                                            | low APOBEC3A |
| S272                  | 0.025905368                                            | low APOBEC3A |
| S970                  | 0.033763014                                            | low APOBEC3A |
| S969                  | 0.037615904                                            | low APOBEC3A |
| S602                  | 0.039259964                                            | low APOBEC3A |
| S420                  | 0.040376653                                            | low APOBEC3A |
| S705                  | 0.043434726                                            | low APOBEC3A |
| S690                  | 0.043510822                                            | low APOBEC3A |
| S477                  | 0.045617662                                            | low APOBEC3A |
| S876                  | 0.056650949                                            | low APOBEC3A |
| S469                  | 0.06865005                                             | low APOBEC3A |
| S2424                 | 0.077857529                                            | low APOBEC3A |
| S1073-2               | 0.078356702                                            | low APOBEC3A |
| S2297                 | 0.092525831                                            | low APOBEC3A |
| S528                  | 0.099074762                                            | low APOBEC3A |
| S297                  | 0.102402322                                            | low APOBEC3A |
| S1065                 | 0.105490441                                            | low APOBEC3A |
| S268                  | 0.141113013                                            | low APOBEC3A |
| S414                  | 0.15210809                                             | low APOBEC3A |
| S389                  | 0.164934084                                            | low APOBEC3A |
| S953                  | 0.182938044                                            | low APOBEC3A |
| S1885                 | 0.207935379                                            | low APOBEC3A |
| S1245                 | 0.212591696                                            | low APOBEC3A |

|       |             |               |
|-------|-------------|---------------|
| S2647 | 0.227195053 | low APOBEC3A  |
| S232  | 0.234023307 | low APOBEC3A  |
| S319  | 0.280119807 | low APOBEC3A  |
| S1770 | 0.290184066 | low APOBEC3A  |
| S227  | 0.291720781 | low APOBEC3A  |
| S520  | 0.331774659 | low APOBEC3A  |
| S261  | 0.343474486 | low APOBEC3A  |
| S971  | 0.350772928 | low APOBEC3A  |
| S2566 | 0.356820728 | low APOBEC3A  |
| S2698 | 0.378368568 | low APOBEC3A  |
| S329  | 0.398854104 | low APOBEC3A  |
| S1236 | 0.40516484  | low APOBEC3A  |
| S935  | 0.428905672 | low APOBEC3A  |
| S229  | 0.522063034 | low APOBEC3A  |
| S1467 | 0.552099424 | low APOBEC3A  |
| S190  | 0.573951207 | low APOBEC3A  |
| S239  | 0.620668731 | low APOBEC3A  |
| S2221 | 0.668016387 | low APOBEC3A  |
| S754  | 0.689128462 | low APOBEC3A  |
| S620  | 0.865448073 | low APOBEC3A  |
| S1054 | 1.005715731 | low APOBEC3A  |
| S318  | 1.100827146 | low APOBEC3A  |
| S580  | 1.752114782 | high APOBEC3A |
| S1780 | 1.868240249 | high APOBEC3A |
| S182  | 2.433858149 | high APOBEC3A |
| S2750 | 2.546349823 | high APOBEC3A |
| S423  | 2.581759827 | high APOBEC3A |
| S131  | 7.111841066 | high APOBEC3A |
| S2170 | 7.680550894 | high APOBEC3A |
| S311  | 8.124450294 | high APOBEC3A |
| S842  | 14.34989213 | high APOBEC3A |
| S933  | 24.89573872 | high APOBEC3A |





| TARGET sample ID         | Normalized A3A read count | Group        | File name                                         | Case ID                   |
|--------------------------|---------------------------|--------------|---------------------------------------------------|---------------------------|
| TARGET.20.PADDXZ.03A.02R | 0.717027549               | low APOBEC3A | TARGET-20-PADDXZ-03A-02R.gene.quantification.txt  | TARGET-20-PADDXZ-03A-02R  |
| TARGET.20.PANJGR.09A.03R | 1.294710383               | low APOBEC3A | TARGET-20-PANJGR-09A-03R.gene.quantification.txt  | TARGET-20-PANJGR-09A-03R  |
| TARGET.21.PANVPB.09A.02R | 1.940649679               | low APOBEC3A | TARGET-21-PANVPB-09A-02R.gene.quantification.txt  | TARGET-21-PANVPB-09A-02R  |
| TARGET.20.PASWLN.09A.01R | 2.191293374               | low APOBEC3A | TARGET-20-PASWLN-09A-01R.gene.quantification.txt  | TARGET-20-PASWLN-09A-01R  |
| TARGET.20.PARGVC.03A.03R | 2.930822631               | low APOBEC3A | TARGET-20-PARGVC-03A-03R.gene.quantification.txt  | TARGET-20-PARGVC-03A-03R  |
| TARGET.20.PANVBP.09A.02R | 4.409221264               | low APOBEC3A | TARGET-20-PANVBP-09A-02R.gene.quantification.txt  | TARGET-20-PANVBP-09A-02R  |
| TARGET.20.PARCCH.03A.03R | 5.11659968                | low APOBEC3A | TARGET-20-PARCCH-03A-03R.gene.quantification.txt  | TARGET-20-PARCCH-03A-03R  |
| TARGET.20.PARGTL.09A.02R | 5.758412472               | low APOBEC3A | TARGET-20-PARGTL-09A-02R.gene.quantification.txt  | TARGET-20-PARGTL-09A-02R  |
| TARGET.20.PANVGP.03A.04R | 7.147706033               | low APOBEC3A | TARGET-20-PANVGP-03A-04R.gene.quantification.txt  | TARGET-20-PANVGP-03A-04R  |
| TARGET.20.PARHJV.09A.01R | 7.960646575               | low APOBEC3A | TARGET-20-PARHJV-09A-01R.gene.quantification.txt  | TARGET-20-PARHJV-09A-01R  |
| TARGET.20.PAKERZ.09A.01R | 8.420362498               | low APOBEC3A | TARGET-20-PAKERZ-09A-01R.gene.quantification.txt  | TARGET-20-PAKERZ-09A-01R  |
| TARGET.20.PARHVK.09A.04R | 9.559195637               | low APOBEC3A | TARGET-20-PARHVK-09A-04R.gene.quantification.txt  | TARGET-20-PARHVK-09A-04R  |
| TARGET.20.PARDDA.09A.02R | 9.783622891               | low APOBEC3A | TARGET-20-PARDDA-09A-02R.gene.quantification.txt  | TARGET-20-PARDDA-09A-02R  |
| TARGET.20.PABHET.03A.02R | 14.73626835               | low APOBEC3A | TARGET-20-PABHET-03A-02R.gene.quantification.txt  | TARGET-20-PABHET-03A-02R  |
| TARGET.20.PASWPD.09A.02R | 15.54512017               | low APOBEC3A | TARGET-20-PASWPD-09A-02R.gene.quantification.txt  | TARGET-20-PASWPD-09A-02R  |
| TARGET.20.PANLIZ.09A.03R | 16.3175941                | low APOBEC3A | TARGET-20-PANLIZ-09A-03R.gene.quantification.txt  | TARGET-20-PANLIZ-09A-03R  |
| TARGET.20.PANHYK.09A.01R | 16.60259923               | low APOBEC3A | TARGET-20-PANHYK-09A-01R.gene.quantification.txt  | TARGET-20-PANHYK-09A-01R  |
| TARGET.20.PARURV.09A.02R | 16.921871                 | low APOBEC3A | TARGET-20-PARURV-09A-02R.gene.quantification.txt  | TARGET-20-PARURV-09A-02R  |
| TARGET.20.PANFMG.09A.04R | 23.13794085               | low APOBEC3A | TARGET-20-PANFMG-09A-04R.gene.quantification.txt  | TARGET-20-PANFMG-09A-04R  |
| TARGET.20.PARCUK.09A.03R | 23.20698162               | low APOBEC3A | TARGET-20-PARCUK-09A-03R.gene.quantification.txt  | TARGET-20-PARCUK-09A-03R  |
| TARGET.20.PAKKBK.09A.02R | 24.16952005               | low APOBEC3A | TARGET-20-PAKKBK-09A-02R.gene.quantification.txt  | TARGET-20-PAKKBK-09A-02R  |
| TARGET.20.PASBHI.09A.01R | 25.88399366               | low APOBEC3A | TARGET-20-PASBHI-09A-01R.gene.quantification.txt  | TARGET-20-PASBHI-09A-01R  |
| TARGET.20.PAKSMZ.03A.02R | 27.61070376               | low APOBEC3A | TARGET-20-PAKSMZ-03A-02R.gene.quantification.txt  | TARGET-20-PAKSMZ-03A-02R  |
| TARGET.20.PAEFGT.03A.01R | 27.92178732               | low APOBEC3A | TARGET-20-PAEFGT-03A-01R.gene.quantification.txt  | TARGET-20-PAEFGT-03A-01R  |
| TARGET.20.PASREH.09A.02R | 28.29525431               | low APOBEC3A | TARGET-20-PASREH-09A-02R.gene.quantification.txt  | TARGET-20-PASREH-09A-02R  |
| TARGET.20.PARMME.09A.02R | 29.65029377               | low APOBEC3A | TARGET-20-PAARMME-09A-02R.gene.quantification.txt | TARGET-20-PAARMME-09A-02R |
| TARGET.20.PARLMY.09A.01R | 30.61381141               | low APOBEC3A | TARGET-20-PARLMY-09A-01R.gene.quantification.txt  | TARGET-20-PARLMY-09A-01R  |
| TARGET.20.PASEGC.09A.01R | 31.26224153               | low APOBEC3A | TARGET-20-PASEGC-09A-01R.gene.quantification.txt  | TARGET-20-PASEGC-09A-01R  |
| TARGET.20.PARHBA.03A.02R | 31.54405511               | low APOBEC3A | TARGET-20-PARHBA-03A-02R.gene.quantification.txt  | TARGET-20-PARHBA-03A-02R  |
| TARGET.20.PACDZR.09A.02R | 31.81624221               | low APOBEC3A | TARGET-20-PACDZR-09A-02R.gene.quantification.txt  | TARGET-20-PACDZR-09A-02R  |
| TARGET.20.PASJEJ.09A.02R | 36.04772468               | low APOBEC3A | TARGET-20-PASJEJ-09A-02R.gene.quantification.txt  | TARGET-20-PASJEJ-09A-02R  |
| TARGET.20.PASECW.09A.04R | 37.17378282               | low APOBEC3A | TARGET-20-PASECW-09A-04R.gene.quantification.txt  | TARGET-20-PASECW-09A-04R  |
| TARGET.20.PASIZX.09A.01R | 37.27194897               | low APOBEC3A | TARGET-20-PASIZX-09A-01R.gene.quantification.txt  | TARGET-20-PASIZX-09A-01R  |
| TARGET.20.PANLXM.09A.03R | 38.83974625               | low APOBEC3A | TARGET-20-PANLXM-09A-03R.gene.quantification.txt  | TARGET-20-PANLXM-09A-03R  |
| TARGET.20.PARENB.09A.03R | 41.71140015               | low APOBEC3A | TARGET-20-PARENB-09A-03R.gene.quantification.txt  | TARGET-20-PARENB-09A-03R  |
| TARGET.20.PARCZL.09A.02R | 42.62918216               | low APOBEC3A | TARGET-20-PARCZL-09A-02R.gene.quantification.txt  | TARGET-20-PARCZL-09A-02R  |
| TARGET.20.PAECBZ.09A.03R | 42.76456582               | low APOBEC3A | TARGET-20-PAECBZ-09A-03R.gene.quantification.txt  | TARGET-20-PAECBZ-09A-03R  |
| TARGET.20.PASPTW.09A.02R | 43.99112484               | low APOBEC3A | TARGET-20-PASPTW-09A-02R.gene.quantification.txt  | TARGET-20-PASPTW-09A-02R  |
| TARGET.20.PAEJBT.09A.02R | 47.74170886               | low APOBEC3A | TARGET-20-PAEJBT-09A-02R.gene.quantification.txt  | TARGET-20-PAEJBT-09A-02R  |
| TARGET.20.PANLXK.09A.03R | 47.9442863                | low APOBEC3A | TARGET-20-PANLXK-09A-03R.gene.quantification.txt  | TARGET-20-PANLXK-09A-03R  |
| TARGET.20.PASWTY.09A.01R | 51.96600607               | low APOBEC3A | TARGET-20-PASWTY-09A-01R.gene.quantification.txt  | TARGET-20-PASWTY-09A-01R  |
| TARGET.20.PARKFB.09A.02R | 53.98420204               | low APOBEC3A | TARGET-20-PARKFB-09A-02R.gene.quantification.txt  | TARGET-20-PARKFB-09A-02R  |
| TARGET.20.PANLJN.09A.03R | 55.06071808               | low APOBEC3A | TARGET-20-PANLJN-09A-03R.gene.quantification.txt  | TARGET-20-PANLJN-09A-03R  |
| TARGET.20.PANNJI.09A.03R | 57.94768732               | low APOBEC3A | TARGET-20-PANNJI-09A-03R.gene.quantification.txt  | TARGET-20-PANNJI-09A-03R  |
| TARGET.20.PARTYV.09A.03R | 60.466192                 | low APOBEC3A | TARGET-20-PARTYV-09A-03R.gene.quantification.txt  | TARGET-20-PARTYV-09A-03R  |
| TARGET.20.PARIZR.03A.02R | 62.95003256               | low APOBEC3A | TARGET-20-PARIZR-03A-02R.gene.quantification.txt  | TARGET-20-PARIZR-03A-02R  |
| TARGET.20.PABHKY.03A.02R | 63.63237969               | low APOBEC3A | TARGET-20-PABHKY-03A-02R.gene.quantification.txt  | TARGET-20-PABHKY-03A-02R  |
| TARGET.20.PARZWH.09A.03R | 64.22849285               | low APOBEC3A | TARGET-20-PARZWH-09A-03R.gene.quantification.txt  | TARGET-20-PARZWH-09A-03R  |
| TARGET.20.PANKFG.09A.02R | 65.37880888               | low APOBEC3A | TARGET-20-PANKFG-09A-02R.gene.quantification.txt  | TARGET-20-PANKFG-09A-02R  |
| TARGET.20.PAERAH.09A.03R | 67.5985909                | low APOBEC3A | TARGET-20-PAERAH-09A-03R.gene.quantification.txt  | TARGET-20-PAERAH-09A-03R  |
| TARGET.20.PATBFL.09A.01R | 67.80420342               | low APOBEC3A | TARGET-20-PATBFL-09A-01R.gene.quantification.txt  | TARGET-20-PATBFL-09A-01R  |
| TARGET.20.PAPAEG.09A.02R | 68.68057426               | low APOBEC3A | TARGET-20-PAPAEG-09A-02R.gene.quantification.txt  | TARGET-20-PAPAEG-09A-02R  |
| TARGET.20.PARYVW.09A.01R | 69.83008931               | low APOBEC3A | TARGET-20-PARYVW-09A-01R.gene.quantification.txt  | TARGET-20-PARYVW-09A-01R  |
| TARGET.20.PANLLX.09A.01R | 69.84227802               | low APOBEC3A | TARGET-20-PANLLX-09A-01R.gene.quantification.txt  | TARGET-20-PANLLX-09A-01R  |
| TARGET.20.PARAJX.09A.02R | 69.97907757               | low APOBEC3A | TARGET-20-PARAJX-09A-02R.gene.quantification.txt  | TARGET-20-PARAJX-09A-02R  |
| TARGET.20.PASFNP.09A.02R | 70.95005008               | low APOBEC3A | TARGET-20-PASFNP-09A-02R.gene.quantification.txt  | TARGET-20-PASFNP-09A-02R  |
| TARGET.20.PANDER.09A.02R | 74.21083933               | low APOBEC3A | TARGET-20-PANDER-09A-02R.gene.quantification.txt  | TARGET-20-PANDER-09A-02R  |
| TARGET.20.PASFLM.09A.01R | 74.35386952               | low APOBEC3A | TARGET-20-PASFLM-09A-01R.gene.quantification.txt  | TARGET-20-PASFLM-09A-01R  |
| TARGET.20.PARVUA.03A.02R | 76.45436161               | low APOBEC3A | TARGET-20-PARVUA-03A-02R.gene.quantification.txt  | TARGET-20-PARVUA-03A-02R  |
| TARGET.20.PARDZW.09A.01R | 78.83452817               | low APOBEC3A | TARGET-20-PARDZW-09A-01R.gene.quantification.txt  | TARGET-20-PARDZW-09A-01R  |
| TARGET.20.PARUWX.09A.02R | 82.92449743               | low APOBEC3A | TARGET-20-PARUWX-09A-02R.gene.quantification.txt  | TARGET-20-PARUWX-09A-02R  |
| TARGET.20.PANSBH.09A.05R | 83.35668138               | low APOBEC3A | TARGET-20-PANSBH-09A-05R.gene.quantification.txt  | TARGET-20-PANSBH-09A-05R  |
| TARGET.20.PARHVI.03A.03R | 84.48357252               | low APOBEC3A | TARGET-20-PARHVI-03A-03R.gene.quantification.txt  | TARGET-20-PARHVI-03A-03R  |
| TARGET.20.PASVYL.09A.01R | 85.10610336               | low APOBEC3A | TARGET-20-PASVYL-09A-01R.gene.quantification.txt  | TARGET-20-PASVYL-09A-01R  |
| TARGET.20.PASMHY.03A.03R | 85.48028681               | low APOBEC3A | TARGET-20-PASMHY-03A-03R.gene.quantification.txt  | TARGET-20-PASMHY-03A-03R  |
| TARGET.20.PAPXUF.09A.01R | 87.03231994               | low APOBEC3A | TARGET-20-PAPXUF-09A-01R.gene.quantification.txt  | TARGET-20-PAPXUF-09A-01R  |
| TARGET.20.PARCEV.09A.02R | 90.08995464               | low APOBEC3A | TARGET-20-PARCEV-09A-02R.gene.quantification.txt  | TARGET-20-PARCEV-09A-02R  |
| TARGET.20.PARUNX.09A.04R | 90.97365373               | low APOBEC3A | TARGET-20-PARUNX-09A-04R.gene.quantification.txt  | TARGET-20-PARUNX-09A-04R  |
| TARGET.20.PAPBEJ.09A.03R | 97.19337915               | low APOBEC3A | TARGET-20-PAPBEJ-09A-03R.gene.quantification.txt  | TARGET-20-PAPBEJ-09A-03R  |
| TARGET.20.PATDNN.09A.03R | 97.34424466               | low APOBEC3A | TARGET-20-PATDNN-09A-03R.gene.quantification.txt  | TARGET-20-PATDNN-09A-03R  |
| TARGET.20.PASPGA.09A.02R | 100.7923104               | low APOBEC3A | TARGET-20-PASPGA-09A-02R.gene.quantification.txt  | TARGET-20-PASPGA-09A-02R  |

|                          |             |              |                                                  |                          |
|--------------------------|-------------|--------------|--------------------------------------------------|--------------------------|
| TARGET.20.PANINI.09A.03R | 104.8782706 | low APOBEC3A | TARGET-20-PANINI-09A-03R.gene.quantification.txt | TARGET-20-PANINI-09A-03R |
| TARGET.21.PASSLT.09A.01R | 105.4146519 | low APOBEC3A | TARGET-21-PASSLT-09A-01R.gene.quantification.txt | TARGET-21-PASSLT-09A-01R |
| TARGET.20.PARDDY.09A.05R | 106.285208  | low APOBEC3A | TARGET-20-PARDDY-09A-05R.gene.quantification.txt | TARGET-20-PARDDY-09A-05R |
| TARGET.20.PARPDS.09A.01R | 108.5481031 | low APOBEC3A | TARGET-20-PARPDS-09A-01R.gene.quantification.txt | TARGET-20-PARPDS-09A-01R |
| TARGET.20.PABLDZ.09A.04R | 112.4233796 | low APOBEC3A | TARGET-20-PABLDZ-09A-04R.gene.quantification.txt | TARGET-20-PABLDZ-09A-04R |
| TARGET.20.PASGGK.03A.01R | 116.0217391 | low APOBEC3A | TARGET-20-PASGGK-03A-01R.gene.quantification.txt | TARGET-20-PASGGK-03A-01R |
| TARGET.20.PARZUU.09A.04R | 118.3466367 | low APOBEC3A | TARGET-20-PARZUU-09A-04R.gene.quantification.txt | TARGET-20-PARZUU-09A-04R |
| TARGET.20.PANUUA.09A.02R | 121.3065583 | low APOBEC3A | TARGET-20-PANUUA-09A-02R.gene.quantification.txt | TARGET-20-PANUUA-09A-02R |
| TARGET.20.PANBZH.09A.03R | 124.9862232 | low APOBEC3A | TARGET-20-PANBZH-09A-03R.gene.quantification.txt | TARGET-20-PANBZH-09A-03R |
| TARGET.20.PANGJY.09A.03R | 127.7131546 | low APOBEC3A | TARGET-20-PANGJY-09A-03R.gene.quantification.txt | TARGET-20-PANGJY-09A-03R |
| TARGET.20.PASXYG.09A.05R | 130.873972  | low APOBEC3A | TARGET-20-PASXYG-09A-05R.gene.quantification.txt | TARGET-20-PASXYG-09A-05R |
| TARGET.20.PANLKB.09A.03R | 132.3013216 | low APOBEC3A | TARGET-20-PANLKB-09A-03R.gene.quantification.txt | TARGET-20-PANLKB-09A-03R |
| TARGET.20.PANSJB.09A.03R | 137.8778155 | low APOBEC3A | TARGET-20-PANSJB-09A-03R.gene.quantification.txt | TARGET-20-PANSJB-09A-03R |
| TARGET.20.PASCCS.09A.01R | 141.2112765 | low APOBEC3A | TARGET-20-PASCCS-09A-01R.gene.quantification.txt | TARGET-20-PASCCS-09A-01R |
| TARGET.20.PASPKE.09A.04R | 141.6832161 | low APOBEC3A | TARGET-20-PASPKE-09A-04R.gene.quantification.txt | TARGET-20-PASPKE-09A-04R |
| TARGET.20.PARPF.09A.02R  | 143.0442038 | low APOBEC3A | TARGET-20-PARPF-09A-02R.gene.quantification.txt  | TARGET-20-PARPF-09A-02R  |
| TARGET.20.PASLDL.09A.02R | 145.6952968 | low APOBEC3A | TARGET-20-PASLDL-09A-02R.gene.quantification.txt | TARGET-20-PASLDL-09A-02R |
| TARGET.20.PARPVZ.09A.02R | 146.2778997 | low APOBEC3A | TARGET-20-PARPVZ-09A-02R.gene.quantification.txt | TARGET-20-PARPVZ-09A-02R |
| TARGET.20.PANZKA.09A.04R | 148.5573231 | low APOBEC3A | TARGET-20-PANZKA-09A-04R.gene.quantification.txt | TARGET-20-PANZKA-09A-04R |
| TARGET.20.PAEEYP.09A.02R | 154.5730583 | low APOBEC3A | TARGET-20-PAEEYP-09A-02R.gene.quantification.txt | TARGET-20-PAEEYP-09A-02R |
| TARGET.20.PARJWH.09A.01R | 161.4335618 | low APOBEC3A | TARGET-20-PARJWH-09A-01R.gene.quantification.txt | TARGET-20-PARJWH-09A-01R |
| TARGET.20.PARBIU.09A.03R | 164.1995641 | low APOBEC3A | TARGET-20-PARBIU-09A-03R.gene.quantification.txt | TARGET-20-PARBIU-09A-03R |
| TARGET.20.PAECCE.09A.01R | 172.6032839 | low APOBEC3A | TARGET-20-PAECCE-09A-01R.gene.quantification.txt | TARGET-20-PAECCE-09A-01R |
| TARGET.20.PASPTM.09A.03R | 173.2258943 | low APOBEC3A | TARGET-20-PASPTM-09A-03R.gene.quantification.txt | TARGET-20-PASPTM-09A-03R |
| TARGET.20.PANZWB.09A.02R | 173.6963824 | low APOBEC3A | TARGET-20-PANZWB-09A-02R.gene.quantification.txt | TARGET-20-PANZWB-09A-02R |
| TARGET.21.PASDXR.09A.02R | 176.0959542 | low APOBEC3A | TARGET-21-PASDXR-09A-02R.gene.quantification.txt | TARGET-21-PASDXR-09A-02R |
| TARGET.20.PAPVGE.09A.03R | 178.610718  | low APOBEC3A | TARGET-20-PAPVGE-09A-03R.gene.quantification.txt | TARGET-20-PAPVGE-09A-03R |
| TARGET.20.PATELT.03A.05R | 184.5212277 | low APOBEC3A | TARGET-20-PATELT-03A-05R.gene.quantification.txt | TARGET-20-PATELT-03A-05R |
| TARGET.20.PASPSV.09A.02R | 184.9487019 | low APOBEC3A | TARGET-20-PASPSV-09A-02R.gene.quantification.txt | TARGET-20-PASPSV-09A-02R |
| TARGET.20.PADZKD.09A.02R | 185.5396885 | low APOBEC3A | TARGET-20-PADZKD-09A-02R.gene.quantification.txt | TARGET-20-PADZKD-09A-02R |
| TARGET.20.PAMYGX.09A.03R | 190.0984945 | low APOBEC3A | TARGET-20-PAMYGX-09A-03R.gene.quantification.txt | TARGET-20-PAMYGX-09A-03R |
| TARGET.20.PANNHB.09A.03R | 197.8577791 | low APOBEC3A | TARGET-20-PANNHB-09A-03R.gene.quantification.txt | TARGET-20-PANNHB-09A-03R |
| TARGET.20.PANUTB.09A.05R | 201.8884758 | low APOBEC3A | TARGET-20-PANUTB-09A-05R.gene.quantification.txt | TARGET-20-PANUTB-09A-05R |
| TARGET.20.PAESVN.09A.02R | 222.5613709 | low APOBEC3A | TARGET-20-PAESVN-09A-02R.gene.quantification.txt | TARGET-20-PAESVN-09A-02R |
| TARGET.20.PASIBG.09A.01R | 225.9597477 | low APOBEC3A | TARGET-20-PASIBG-09A-01R.gene.quantification.txt | TARGET-20-PASIBG-09A-01R |
| TARGET.21.PASYWA.09A.01R | 253.8727746 | low APOBEC3A | TARGET-21-PASYWA-09A-01R.gene.quantification.txt | TARGET-21-PASYWA-09A-01R |
| TARGET.20.PARDMG.09A.03R | 268.5728081 | low APOBEC3A | TARGET-20-PARDMG-09A-03R.gene.quantification.txt | TARGET-20-PARDMG-09A-03R |
| TARGET.20.PASFEW.09A.05R | 275.9275152 | low APOBEC3A | TARGET-20-PASFEW-09A-05R.gene.quantification.txt | TARGET-20-PASFEW-09A-05R |
| TARGET.20.PANGCM.03A.03R | 276.6569374 | low APOBEC3A | TARGET-20-PANGCM-03A-03R.gene.quantification.txt | TARGET-20-PANGCM-03A-03R |
| TARGET.20.PAEIKD.09A.01R | 284.3688316 | low APOBEC3A | TARGET-20-PAEIKD-09A-01R.gene.quantification.txt | TARGET-20-PAEIKD-09A-01R |
| TARGET.20.PAMYAS.09A.03R | 285.8191651 | low APOBEC3A | TARGET-20-PAMYAS-09A-03R.gene.quantification.txt | TARGET-20-PAMYAS-09A-03R |
| TARGET.20.PABGKN.09A.01R | 290.0885858 | low APOBEC3A | TARGET-20-PABGKN-09A-01R.gene.quantification.txt | TARGET-20-PABGKN-09A-01R |
| TARGET.20.PALBYP.09A.02R | 302.6244106 | low APOBEC3A | TARGET-20-PALBYP-09A-02R.gene.quantification.txt | TARGET-20-PALBYP-09A-02R |
| TARGET.20.PANCS.09A.03R  | 306.6481909 | low APOBEC3A | TARGET-20-PANCS-09A-03R.gene.quantification.txt  | TARGET-20-PANCS-09A-03R  |
| TARGET.20.PARASV.03A.03R | 307.272063  | low APOBEC3A | TARGET-20-PARASV-03A-03R.gene.quantification.txt | TARGET-20-PARASV-03A-03R |
| TARGET.20.PATDHA.09A.01R | 320.7549971 | low APOBEC3A | TARGET-20-PATDHA-09A-01R.gene.quantification.txt | TARGET-20-PATDHA-09A-01R |
| TARGET.20.PARANT.09A.02R | 321.7092414 | low APOBEC3A | TARGET-20-PARANT-09A-02R.gene.quantification.txt | TARGET-20-PARANT-09A-02R |
| TARGET.20.PAMVKZ.09A.03R | 321.9796419 | low APOBEC3A | TARGET-20-PAMVKZ-09A-03R.gene.quantification.txt | TARGET-20-PAMVKZ-09A-03R |
| TARGET.20.PANGTF.09A.04R | 349.7191649 | low APOBEC3A | TARGET-20-PANGTF-09A-04R.gene.quantification.txt | TARGET-20-PANGTF-09A-04R |
| TARGET.20.PARUUB.09A.02R | 354.3420048 | low APOBEC3A | TARGET-20-PARUUB-09A-02R.gene.quantification.txt | TARGET-20-PARUUB-09A-02R |
| TARGET.20.PARFAL.09A.05R | 356.0137521 | low APOBEC3A | TARGET-20-PARFAL-09A-05R.gene.quantification.txt | TARGET-20-PARFAL-09A-05R |
| TARGET.20.PANYGP.09A.01R | 362.3950628 | low APOBEC3A | TARGET-20-PANYGP-09A-01R.gene.quantification.txt | TARGET-20-PANYGP-09A-01R |
| TARGET.20.PASZLJ.09A.01R | 370.3810574 | low APOBEC3A | TARGET-20-PASZLJ-09A-01R.gene.quantification.txt | TARGET-20-PASZLJ-09A-01R |
| TARGET.20.PANTNA.09A.02R | 374.9163296 | low APOBEC3A | TARGET-20-PANTNA-09A-02R.gene.quantification.txt | TARGET-20-PANTNA-09A-02R |
| TARGET.20.PASHYZ.09A.03R | 381.3998328 | low APOBEC3A | TARGET-20-PASHYZ-09A-03R.gene.quantification.txt | TARGET-20-PASHYZ-09A-03R |
| TARGET.20.PANPLS.03A.04R | 395.3513661 | low APOBEC3A | TARGET-20-PANPLS-03A-04R.gene.quantification.txt | TARGET-20-PANPLS-03A-04R |
| TARGET.20.PASGWH.09A.04R | 399.9979174 | low APOBEC3A | TARGET-20-PASGWH-09A-04R.gene.quantification.txt | TARGET-20-PASGWH-09A-04R |
| TARGET.20.PANDIX.09A.03R | 401.6163031 | low APOBEC3A | TARGET-20-PANDIX-09A-03R.gene.quantification.txt | TARGET-20-PANDIX-09A-03R |
| TARGET.20.PALHVV.09A.02R | 411.561432  | low APOBEC3A | TARGET-20-PALHVV-09A-02R.gene.quantification.txt | TARGET-20-PALHVV-09A-02R |
| TARGET.20.PASHBI.09A.01R | 419.926855  | low APOBEC3A | TARGET-20-PASHBI-09A-01R.gene.quantification.txt | TARGET-20-PASHBI-09A-01R |
| TARGET.20.PARMZF.09A.02R | 421.143172  | low APOBEC3A | TARGET-20-PARMZF-09A-02R.gene.quantification.txt | TARGET-20-PARMZF-09A-02R |
| TARGET.21.PATKJ.09A.01R  | 421.563913  | low APOBEC3A | TARGET-21-PATKJ-09A-01R.gene.quantification.txt  | TARGET-21-PATKJ-09A-01R  |
| TARGET.20.PARMZC.09A.02R | 428.7975747 | low APOBEC3A | TARGET-20-PARMZC-09A-02R.gene.quantification.txt | TARGET-20-PARMZC-09A-02R |
| TARGET.20.PARXBT.09A.02R | 436.8093609 | low APOBEC3A | TARGET-20-PARXBT-09A-02R.gene.quantification.txt | TARGET-20-PARXBT-09A-02R |
| TARGET.20.PAEAKL.09A.03R | 441.6164608 | low APOBEC3A | TARGET-20-PAEAKL-09A-03R.gene.quantification.txt | TARGET-20-PAEAKL-09A-03R |
| TARGET.20.PALGKX.09A.03R | 452.6508135 | low APOBEC3A | TARGET-20-PALGKX-09A-03R.gene.quantification.txt | TARGET-20-PALGKX-09A-03R |
| TARGET.20.PASMGW.09A.01R | 454.8997355 | low APOBEC3A | TARGET-20-PASMGW-09A-01R.gene.quantification.txt | TARGET-20-PASMGW-09A-01R |
| TARGET.20.PASWPT.09A.01R | 469.7751208 | low APOBEC3A | TARGET-20-PASWPT-09A-01R.gene.quantification.txt | TARGET-20-PASWPT-09A-01R |
| TARGET.20.PAPZIZ.09A.03R | 474.2193155 | low APOBEC3A | TARGET-20-PAPZIZ-09A-03R.gene.quantification.txt | TARGET-20-PAPZIZ-09A-03R |
| TARGET.21.PASFJJ.09A.01R | 477.9238464 | low APOBEC3A | TARGET-21-PASFJJ-09A-01R.gene.quantification.txt | TARGET-21-PASFJJ-09A-01R |
| TARGET.21.PARBT.09A.03R  | 500.8016064 | low APOBEC3A | TARGET-21-PARBT-09A-03R.gene.quantification.txt  | TARGET-21-PARBT-09A-03R  |
| TARGET.20.PATJHJ.09A.01R | 510.4275024 | low APOBEC3A | TARGET-20-PATJHJ-09A-01R.gene.quantification.txt | TARGET-20-PATJHJ-09A-01R |

|                           |             |              |                                                   |                           |
|---------------------------|-------------|--------------|---------------------------------------------------|---------------------------|
| TARGET.20.PANYSN.03A.04R  | 515.3185332 | low APOBEC3A | TARGET-20-PANYSN-03A-04R.gene.quantification.txt  | TARGET-20-PANYSN-03A-04R  |
| TARGET.20.PANKNB.09A.03R  | 518.2647115 | low APOBEC3A | TARGET-20-PANKNB-09A-03R.gene.quantification.txt  | TARGET-20-PANKNB-09A-03R  |
| TARGET.20.PAEFGR.09A.02R  | 583.2807254 | low APOBEC3A | TARGET-20-PAEFGR-09A-02R.gene.quantification.txt  | TARGET-20-PAEFGR-09A-02R  |
| TARGET.20.PAEERJ.09A.01R  | 596.3932016 | low APOBEC3A | TARGET-20-PAEERJ-09A-01R.gene.quantification.txt  | TARGET-20-PAEERJ-09A-01R  |
| TARGET.21.PARZIA.09A.01R  | 601.000162  | low APOBEC3A | TARGET-21-PARZIA-09A-01R.gene.quantification.txt  | TARGET-21-PARZIA-09A-01R  |
| TARGET.20.PATAST.09A.01R  | 610.6667715 | low APOBEC3A | TARGET-20-PATAST-09A-01R.gene.quantification.txt  | TARGET-20-PATAST-09A-01R  |
| TARGET.20.PANKFZ.09A.04R  | 618.1221145 | low APOBEC3A | TARGET-20-PANKFZ-09A-04R.gene.quantification.txt  | TARGET-20-PANKFZ-09A-04R  |
| TARGET.20.PANKKE.09A.03R  | 630.5701736 | low APOBEC3A | TARGET-20-PANKKE-09A-03R.gene.quantification.txt  | TARGET-20-PANKKE-09A-03R  |
| TARGET.20.PANLRE.09A.05R  | 640.8296335 | low APOBEC3A | TARGET-20-PANLRE-09A-05R.gene.quantification.txt  | TARGET-20-PANLRE-09A-05R  |
| TARGET.20.PANPTM.09A.02R  | 642.2210868 | low APOBEC3A | TARGET-20-PANPTM-09A-02R.gene.quantification.txt  | TARGET-20-PANPTM-09A-02R  |
| TARGET.20.PAPVZK.09A.03R  | 656.0220925 | low APOBEC3A | TARGET-20-PAPVZK-09A-03R.gene.quantification.txt  | TARGET-20-PAPVZK-09A-03R  |
| TARGET.20.PARLSW.09A.02R  | 677.6048694 | low APOBEC3A | TARGET-20-PARLSW-09A-02R.gene.quantification.txt  | TARGET-20-PARLSW-09A-02R  |
| TARGET.20.PASRTP.09A.01R  | 681.8879994 | low APOBEC3A | TARGET-20-PASRTP-09A-01R.gene.quantification.txt  | TARGET-20-PASRTP-09A-01R  |
| TARGET.20.PAMVVP.09A.03R  | 682.4682947 | low APOBEC3A | TARGET-20-PAMVVP-09A-03R.gene.quantification.txt  | TARGET-20-PAMVVP-09A-03R  |
| TARGET.20.PASSSI.09A.02R  | 690.2829077 | low APOBEC3A | TARGET-20-PASSSI-09A-02R.gene.quantification.txt  | TARGET-20-PASSSI-09A-02R  |
| TARGET.20.PARBVE.09A.02R  | 719.219173  | low APOBEC3A | TARGET-20-PARBVE-09A-02R.gene.quantification.txt  | TARGET-20-PARBVE-09A-02R  |
| TARGET.20.PALVKV.09A.02R  | 724.9612917 | low APOBEC3A | TARGET-20-PALVKV-09A-02R.gene.quantification.txt  | TARGET-20-PALVKV-09A-02R  |
| TARGET.20.PARCHW.09A.01R  | 731.495527  | low APOBEC3A | TARGET-20-PARCHW-09A-01R.gene.quantification.txt  | TARGET-20-PARCHW-09A-01R  |
| TARGET.20.PARBZF.03A.02R  | 734.3979201 | low APOBEC3A | TARGET-20-PARBZF-03A-02R.gene.quantification.txt  | TARGET-20-PARBZF-03A-02R  |
| TARGET.20.PAE AFC.09A.03R | 741.1215176 | low APOBEC3A | TARGET-20-PAE AFC-09A-03R.gene.quantification.txt | TARGET-20-PAE AFC-09A-03R |
| TARGET.20.PARBXE.09A.04R  | 746.4027851 | low APOBEC3A | TARGET-20-PARBXE-09A-04R.gene.quantification.txt  | TARGET-20-PARBXE-09A-04R  |
| TARGET.20.PASYJI.09A.03R  | 800.6778006 | low APOBEC3A | TARGET-20-PASYJI-09A-03R.gene.quantification.txt  | TARGET-20-PASYJI-09A-03R  |
| TARGET.20.PASLSD.03A.01R  | 810.5766105 | low APOBEC3A | TARGET-20-PASLSD-03A-01R.gene.quantification.txt  | TARGET-20-PASLSD-03A-01R  |
| TARGET.20.PASCFW.09A.01R  | 815.4408359 | low APOBEC3A | TARGET-20-PASCFW-09A-01R.gene.quantification.txt  | TARGET-20-PASCFW-09A-01R  |
| TARGET.20.PANYNR.03A.03R  | 852.2078725 | low APOBEC3A | TARGET-20-PANYNR-03A-03R.gene.quantification.txt  | TARGET-20-PANYNR-03A-03R  |
| TARGET.21.PASTZK.09A.01R  | 896.0130135 | low APOBEC3A | TARGET-21-PASTZK-09A-01R.gene.quantification.txt  | TARGET-21-PASTZK-09A-01R  |
| TARGET.20.PASKGH.09A.01R  | 896.6363478 | low APOBEC3A | TARGET-20-PASKGH-09A-01R.gene.quantification.txt  | TARGET-20-PASKGH-09A-01R  |
| TARGET.20.PAPXWI.09A.03R  | 909.0633734 | low APOBEC3A | TARGET-20-PAPXWI-09A-03R.gene.quantification.txt  | TARGET-20-PAPXWI-09A-03R  |
| TARGET.20.PASNIY.09A.02R  | 913.0215535 | low APOBEC3A | TARGET-20-PASNIY-09A-02R.gene.quantification.txt  | TARGET-20-PASNIY-09A-02R  |
| TARGET.20.PASWAJ.09A.04R  | 917.2720088 | low APOBEC3A | TARGET-20-PASWAJ-09A-04R.gene.quantification.txt  | TARGET-20-PASWAJ-09A-04R  |
| TARGET.20.PASPFE.09A.01R  | 939.43993   | low APOBEC3A | TARGET-20-PASPFE-09A-01R.gene.quantification.txt  | TARGET-20-PASPFE-09A-01R  |
| TARGET.20.PARSHM.03A.02R  | 959.5090223 | low APOBEC3A | TARGET-20-PARSHM-03A-02R.gene.quantification.txt  | TARGET-20-PARSHM-03A-02R  |
| TARGET.21.PANZLR.09A.03R  | 990.9399882 | low APOBEC3A | TARGET-21-PANZLR-09A-03R.gene.quantification.txt  | TARGET-21-PANZLR-09A-03R  |
| TARGET.20.PARXZP.09A.01R  | 1002.620616 | low APOBEC3A | TARGET-20-PARXZP-09A-01R.gene.quantification.txt  | TARGET-20-PARXZP-09A-01R  |
| TARGET.20.PANTPW.09A.02R  | 1041.279939 | low APOBEC3A | TARGET-20-PANTPW-09A-02R.gene.quantification.txt  | TARGET-20-PANTPW-09A-02R  |
| TARGET.20.PANJVI.03A.02R  | 1057.162319 | low APOBEC3A | TARGET-20-PANJVI-03A-02R.gene.quantification.txt  | TARGET-20-PANJVI-03A-02R  |
| TARGET.20.PASFJB.03A.01R  | 1065.652992 | low APOBEC3A | TARGET-20-PASFJB-03A-01R.gene.quantification.txt  | TARGET-20-PASFJB-03A-01R  |
| TARGET.20.PARUTH.09A.04R  | 1070.119952 | low APOBEC3A | TARGET-20-PARUTH-09A-04R.gene.quantification.txt  | TARGET-20-PARUTH-09A-04R  |
| TARGET.20.PAEENN.09A.01R  | 1072.623475 | low APOBEC3A | TARGET-20-PAEENN-09A-01R.gene.quantification.txt  | TARGET-20-PAEENN-09A-01R  |
| TARGET.20.PARSAN.03A.01R  | 1073.717105 | low APOBEC3A | TARGET-20-PARSAN-03A-01R.gene.quantification.txt  | TARGET-20-PARSAN-03A-01R  |
| TARGET.20.PASTPU.09A.01R  | 1095.031794 | low APOBEC3A | TARGET-20-PASTPU-09A-01R.gene.quantification.txt  | TARGET-20-PASTPU-09A-01R  |
| TARGET.20.PARBFJ.09A.02R  | 1103.634652 | low APOBEC3A | TARGET-20-PARBFJ-09A-02R.gene.quantification.txt  | TARGET-20-PARBFJ-09A-02R  |
| TARGET.20.PAPZLT.09A.02R  | 1114.140024 | low APOBEC3A | TARGET-20-PAPZLT-09A-02R.gene.quantification.txt  | TARGET-20-PAPZLT-09A-02R  |
| TARGET.20.PATFDF.09A.01R  | 1150.271049 | low APOBEC3A | TARGET-20-PATFDF-09A-01R.gene.quantification.txt  | TARGET-20-PATFDF-09A-01R  |
| TARGET.20.PAKRUP.09A.02R  | 1165.22999  | low APOBEC3A | TARGET-20-PAKRUP-09A-02R.gene.quantification.txt  | TARGET-20-PAKRUP-09A-02R  |
| TARGET.20.PARXMP.09A.02R  | 1170.491512 | low APOBEC3A | TARGET-20-PARXMP-09A-02R.gene.quantification.txt  | TARGET-20-PARXMP-09A-02R  |
| TARGET.20.PARJCR.09A.01R  | 1179.655665 | low APOBEC3A | TARGET-20-PARJCR-09A-01R.gene.quantification.txt  | TARGET-20-PARJCR-09A-01R  |
| TARGET.20.PAKVGI.09A.01R  | 1188.907083 | low APOBEC3A | TARGET-20-PAKVGI-09A-01R.gene.quantification.txt  | TARGET-20-PAKVGI-09A-01R  |
| TARGET.20.PARTST.09A.02R  | 1206.11999  | low APOBEC3A | TARGET-20-PARTST-09A-02R.gene.quantification.txt  | TARGET-20-PARTST-09A-02R  |
| TARGET.20.PASBPK.09A.02R  | 1228.633609 | low APOBEC3A | TARGET-20-PASBPK-09A-02R.gene.quantification.txt  | TARGET-20-PASBPK-09A-02R  |
| TARGET.20.PASGMZ.09A.01R  | 1237.050457 | low APOBEC3A | TARGET-20-PASGMZ-09A-01R.gene.quantification.txt  | TARGET-20-PASGMZ-09A-01R  |
| TARGET.20.PASIEJ.09A.01R  | 1241.282924 | low APOBEC3A | TARGET-20-PASIEJ-09A-01R.gene.quantification.txt  | TARGET-20-PASIEJ-09A-01R  |
| TARGET.21.PASLZE.09A.01R  | 1317.03137  | low APOBEC3A | TARGET-21-PASLZE-09A-01R.gene.quantification.txt  | TARGET-21-PASLZE-09A-01R  |
| TARGET.20.PARWXU.09A.02R  | 1382.941021 | low APOBEC3A | TARGET-20-PARWXU-09A-02R.gene.quantification.txt  | TARGET-20-PARWXU-09A-02R  |
| TARGET.20.PAPAWN.09A.02R  | 1395.46033  | low APOBEC3A | TARGET-20-PAPAWN-09A-02R.gene.quantification.txt  | TARGET-20-PAPAWN-09A-02R  |
| TARGET.20.PAPVDV.03A.01R  | 1419.177088 | low APOBEC3A | TARGET-20-PAPVDV-03A-01R.gene.quantification.txt  | TARGET-20-PAPVDV-03A-01R  |
| TARGET.20.PAEGRE.03A.02R  | 1498.648582 | low APOBEC3A | TARGET-20-PAEGRE-03A-02R.gene.quantification.txt  | TARGET-20-PAEGRE-03A-02R  |
| TARGET.20.PARUDL.03A.01R  | 1546.147637 | low APOBEC3A | TARGET-20-PARUDL-03A-01R.gene.quantification.txt  | TARGET-20-PARUDL-03A-01R  |
| TARGET.20.PASPWZ.03A.01R  | 1582.053363 | low APOBEC3A | TARGET-20-PASPWZ-03A-01R.gene.quantification.txt  | TARGET-20-PASPWZ-03A-01R  |
| TARGET.20.PAEFHC.09A.02R  | 1604.189791 | low APOBEC3A | TARGET-20-PAEFHC-09A-02R.gene.quantification.txt  | TARGET-20-PAEFHC-09A-02R  |
| TARGET.20.PARWDZ.09A.01R  | 1615.197232 | low APOBEC3A | TARGET-20-PARWDZ-09A-01R.gene.quantification.txt  | TARGET-20-PARWDZ-09A-01R  |
| TARGET.21.PATAIJ.09A.01R  | 1627.961973 | low APOBEC3A | TARGET-21-PATAIJ-09A-01R.gene.quantification.txt  | TARGET-21-PATAIJ-09A-01R  |
| TARGET.20.PAKHBF.09A.01R  | 1691.429602 | low APOBEC3A | TARGET-20-PAKHBF-09A-01R.gene.quantification.txt  | TARGET-20-PAKHBF-09A-01R  |
| TARGET.21.PASYEJ.09A.01R  | 1723.205022 | low APOBEC3A | TARGET-21-PASYEJ-09A-01R.gene.quantification.txt  | TARGET-21-PASYEJ-09A-01R  |
| TARGET.20.PAPWHS.09A.03R  | 1737.915873 | low APOBEC3A | TARGET-20-PAPWHS-09A-03R.gene.quantification.txt  | TARGET-20-PAPWHS-09A-03R  |
| TARGET.21.PASVJS.09A.01R  | 1744.663523 | low APOBEC3A | TARGET-21-PASVJS-09A-01R.gene.quantification.txt  | TARGET-21-PASVJS-09A-01R  |
| TARGET.20.PASCGR.03A.02R  | 1752.107599 | low APOBEC3A | TARGET-20-PASCGR-03A-02R.gene.quantification.txt  | TARGET-20-PASCGR-03A-02R  |
| TARGET.20.PARTAL.09A.02R  | 1760.803824 | low APOBEC3A | TARGET-20-PARTAL-09A-02R.gene.quantification.txt  | TARGET-20-PARTAL-09A-02R  |
| TARGET.20.PASRRB.03A.01R  | 1778.585862 | low APOBEC3A | TARGET-20-PASRRB-03A-01R.gene.quantification.txt  | TARGET-20-PASRRB-03A-01R  |
| TARGET.20.PARJYP.03A.01R  | 1809.59217  | low APOBEC3A | TARGET-20-PARJYP-03A-01R.gene.quantification.txt  | TARGET-20-PARJYP-03A-01R  |
| TARGET.20.PARXNG.09A.01R  | 1809.949894 | low APOBEC3A | TARGET-20-PARXNG-09A-01R.gene.quantification.txt  | TARGET-20-PARXNG-09A-01R  |
| TARGET.20.PASDGX.09A.02R  | 1849.98911  | low APOBEC3A | TARGET-20-PASDGX-09A-02R.gene.quantification.txt  | TARGET-20-PASDGX-09A-02R  |

|                          |              |               |                                                  |                          |
|--------------------------|--------------|---------------|--------------------------------------------------|--------------------------|
| TARGET.20.PAPWIU.09A.03R | 1871.30617   | low APOBEC3A  | TARGET-20-PAPWIU-09A-03R.gene.quantification.txt | TARGET-20-PAPWIU-09A-03R |
| TARGET.20.PANPKN.09A.03R | 1895.500473  | low APOBEC3A  | TARGET-20-PANPKN-09A-03R.gene.quantification.txt | TARGET-20-PANPKN-09A-03R |
| TARGET.20.PAPWYK.09A.03R | 1910.062789  | low APOBEC3A  | TARGET-20-PAPWYK-09A-03R.gene.quantification.txt | TARGET-20-PAPWYK-09A-03R |
| TARGET.20.PANLIR.09A.02R | 1915.398751  | low APOBEC3A  | TARGET-20-PANLIR-09A-02R.gene.quantification.txt | TARGET-20-PANLIR-09A-02R |
| TARGET.20.PASEFD.09A.01R | 1926.58425   | low APOBEC3A  | TARGET-20-PASEFD-09A-01R.gene.quantification.txt | TARGET-20-PASEFD-09A-01R |
| TARGET.20.PAEGRI.03A.01R | 1978.399638  | low APOBEC3A  | TARGET-20-PAEGRI-03A-01R.gene.quantification.txt | TARGET-20-PAEGRI-03A-01R |
| TARGET.20.PASLYX.09A.02R | 1985.320541  | low APOBEC3A  | TARGET-20-PASLYX-09A-02R.gene.quantification.txt | TARGET-20-PASLYX-09A-02R |
| TARGET.20.PANBWF.09A.03R | 2041.054644  | low APOBEC3A  | TARGET-20-PANBWF-09A-03R.gene.quantification.txt | TARGET-20-PANBWF-09A-03R |
| TARGET.20.PASVVS.09A.03R | 2053.325567  | low APOBEC3A  | TARGET-20-PASVVS-09A-03R.gene.quantification.txt | TARGET-20-PASVVS-09A-03R |
| TARGET.20.PARPWL.09A.03R | 2055.588036  | low APOBEC3A  | TARGET-20-PARPWL-09A-03R.gene.quantification.txt | TARGET-20-PARPWL-09A-03R |
| TARGET.20.PARKCX.09A.03R | 2080.941168  | low APOBEC3A  | TARGET-20-PARKCX-09A-03R.gene.quantification.txt | TARGET-20-PARKCX-09A-03R |
| TARGET.21.PATJMY.09A.01R | 2095.153811  | low APOBEC3A  | TARGET-21-PATJMY-09A-01R.gene.quantification.txt | TARGET-21-PATJMY-09A-01R |
| TARGET.20.PAKIYW.09A.01R | 2208.265534  | low APOBEC3A  | TARGET-20-PAKIYW-09A-01R.gene.quantification.txt | TARGET-20-PAKIYW-09A-01R |
| TARGET.21.PATISD.09A.01R | 2214.489012  | low APOBEC3A  | TARGET-21-PATISD-09A-01R.gene.quantification.txt | TARGET-21-PATISD-09A-01R |
| TARGET.20.PASPLU.09A.02R | 2296.71865   | low APOBEC3A  | TARGET-20-PASPLU-09A-02R.gene.quantification.txt | TARGET-20-PASPLU-09A-02R |
| TARGET.20.PARVAI.03A.02R | 2339.755196  | low APOBEC3A  | TARGET-20-PARVAI-03A-02R.gene.quantification.txt | TARGET-20-PARVAI-03A-02R |
| TARGET.20.PANGDN.09A.05R | 2379.649837  | low APOBEC3A  | TARGET-20-PANGDN-09A-05R.gene.quantification.txt | TARGET-20-PANGDN-09A-05R |
| TARGET.20.PAPXRJ.09A.01R | 2401.760817  | low APOBEC3A  | TARGET-20-PAPXRJ-09A-01R.gene.quantification.txt | TARGET-20-PAPXRJ-09A-01R |
| TARGET.21.PASIGA.09A.01R | 2597.099966  | low APOBEC3A  | TARGET-21-PASIGA-09A-01R.gene.quantification.txt | TARGET-21-PASIGA-09A-01R |
| TARGET.21.PAMXZY.09A.03R | 2672.090705  | low APOBEC3A  | TARGET-21-PAMXZY-09A-03R.gene.quantification.txt | TARGET-21-PAMXZY-09A-03R |
| TARGET.20.PARVSF.09A.02R | 2726.183769  | low APOBEC3A  | TARGET-20-PARVSF-09A-02R.gene.quantification.txt | TARGET-20-PARVSF-09A-02R |
| TARGET.20.PAKIWK.09A.01R | 2738.084336  | low APOBEC3A  | TARGET-20-PAKIWK-09A-01R.gene.quantification.txt | TARGET-20-PAKIWK-09A-01R |
| TARGET.21.PARHRS.09A.02R | 3167.8510972 | low APOBEC3A  | TARGET-21-PARHRS-09A-02R.gene.quantification.txt | TARGET-21-PARHRS-09A-02R |
| TARGET.20.PASUHK.09A.01R | 2935.982822  | low APOBEC3A  | TARGET-20-PASUHK-09A-01R.gene.quantification.txt | TARGET-20-PASUHK-09A-01R |
| TARGET.20.PASSWG.03A.01R | 2998.409819  | low APOBEC3A  | TARGET-20-PASSWG-03A-01R.gene.quantification.txt | TARGET-20-PASSWG-03A-01R |
| TARGET.20.PARYGA.09A.03R | 3094.661217  | low APOBEC3A  | TARGET-20-PARYGA-09A-03R.gene.quantification.txt | TARGET-20-PARYGA-09A-03R |
| TARGET.21.PARXYR.03A.01R | 3167.851488  | low APOBEC3A  | TARGET-21-PARXYR-03A-01R.gene.quantification.txt | TARGET-21-PARXYR-03A-01R |
| TARGET.20.PASTTW.09A.01R | 3278.794086  | low APOBEC3A  | TARGET-20-PASTTW-09A-01R.gene.quantification.txt | TARGET-20-PASTTW-09A-01R |
| TARGET.20.PARBRA.09A.03R | 3553.135179  | low APOBEC3A  | TARGET-20-PARBRA-09A-03R.gene.quantification.txt | TARGET-20-PARBRA-09A-03R |
| TARGET.20.PANWHP.09A.02R | 3587.707176  | low APOBEC3A  | TARGET-20-PANWHP-09A-02R.gene.quantification.txt | TARGET-20-PANWHP-09A-02R |
| TARGET.20.PAPWZR.09A.01R | 3673.659437  | low APOBEC3A  | TARGET-20-PAPWZR-09A-01R.gene.quantification.txt | TARGET-20-PAPWZR-09A-01R |
| TARGET.20.PAMYJX.09A.04R | 3819.807599  | low APOBEC3A  | TARGET-20-PAMYJX-09A-04R.gene.quantification.txt | TARGET-20-PAMYJX-09A-04R |
| TARGET.20.PAKLPD.09A.02R | 3873.682786  | low APOBEC3A  | TARGET-20-PAKLPD-09A-02R.gene.quantification.txt | TARGET-20-PAKLPD-09A-02R |
| TARGET.20.PARYFN.03A.01R | 3917.913183  | low APOBEC3A  | TARGET-20-PARYFN-03A-01R.gene.quantification.txt | TARGET-20-PARYFN-03A-01R |
| TARGET.21.PATHIU.09A.01R | 3957.999305  | low APOBEC3A  | TARGET-21-PATHIU-09A-01R.gene.quantification.txt | TARGET-21-PATHIU-09A-01R |
| TARGET.20.PAKTCX.09A.02R | 4117.77624   | low APOBEC3A  | TARGET-20-PAKTCX-09A-02R.gene.quantification.txt | TARGET-20-PAKTCX-09A-02R |
| TARGET.20.PARIHK.03A.03R | 4135.064191  | low APOBEC3A  | TARGET-20-PARIHK-03A-03R.gene.quantification.txt | TARGET-20-PARIHK-03A-03R |
| TARGET.20.PALFVW.09A.01R | 4505.532073  | high APOBEC3A | TARGET-20-PALFVW-09A-01R.gene.quantification.txt | TARGET-20-PALFVW-09A-01R |
| TARGET.20.PARIMT.03A.01R | 4553.112686  | high APOBEC3A | TARGET-20-PARIMT-03A-01R.gene.quantification.txt | TARGET-20-PARIMT-03A-01R |
| TARGET.20.PANBYS.09A.03R | 4904.255312  | high APOBEC3A | TARGET-20-PANBYS-09A-03R.gene.quantification.txt | TARGET-20-PANBYS-09A-03R |
| TARGET.20.PANVGE.09A.02R | 5256.630799  | high APOBEC3A | TARGET-20-PANVGE-09A-02R.gene.quantification.txt | TARGET-20-PANVGE-09A-02R |
| TARGET.20.PAREFM.09A.02R | 5521.767586  | high APOBEC3A | TARGET-20-PAREFM-09A-02R.gene.quantification.txt | TARGET-20-PAREFM-09A-02R |
| TARGET.20.PADZCG.09A.01R | 5537.427752  | high APOBEC3A | TARGET-20-PADZCG-09A-01R.gene.quantification.txt | TARGET-20-PADZCG-09A-01R |
| TARGET.20.PASJTM.09A.01R | 5854.093077  | high APOBEC3A | TARGET-20-PASJTM-09A-01R.gene.quantification.txt | TARGET-20-PASJTM-09A-01R |
| TARGET.20.PASXVC.09A.01R | 5969.478773  | high APOBEC3A | TARGET-20-PASXVC-09A-01R.gene.quantification.txt | TARGET-20-PASXVC-09A-01R |
| TARGET.20.PASLTF.09A.02R | 6823.047104  | high APOBEC3A | TARGET-20-PASLTF-09A-02R.gene.quantification.txt | TARGET-20-PASLTF-09A-02R |
| TARGET.20.PASBSB.03A.01R | 7198.289708  | high APOBEC3A | TARGET-20-PASBSB-03A-01R.gene.quantification.txt | TARGET-20-PASBSB-03A-01R |
| TARGET.21.PATKKB.03A.01R | 7444.378713  | high APOBEC3A | TARGET-21-PATKKB-03A-01R.gene.quantification.txt | TARGET-21-PATKKB-03A-01R |
| TARGET.20.PATIAK.09A.01R | 7541.201198  | high APOBEC3A | TARGET-20-PATIAK-09A-01R.gene.quantification.txt | TARGET-20-PATIAK-09A-01R |
| TARGET.20.PAKVYM.09A.02R | 8371.06746   | high APOBEC3A | TARGET-20-PAKVYM-09A-02R.gene.quantification.txt | TARGET-20-PAKVYM-09A-02R |
| TARGET.20.PASHWN.09A.01R | 8998.642134  | high APOBEC3A | TARGET-20-PASHWN-09A-01R.gene.quantification.txt | TARGET-20-PASHWN-09A-01R |
| TARGET.20.PASBPW.09A.02R | 9043.562611  | high APOBEC3A | TARGET-20-PASBPW-09A-02R.gene.quantification.txt | TARGET-20-PASBPW-09A-02R |
| TARGET.20.PASVYA.09A.01R | 9209.106767  | high APOBEC3A | TARGET-20-PASVYA-09A-01R.gene.quantification.txt | TARGET-20-PASVYA-09A-01R |
| TARGET.20.PANAEV.09A.03R | 9795.120925  | high APOBEC3A | TARGET-20-PANAEV-09A-03R.gene.quantification.txt | TARGET-20-PANAEV-09A-03R |
| TARGET.20.PADYIR.09A.01R | 9968.6288    | high APOBEC3A | TARGET-20-PADYIR-09A-01R.gene.quantification.txt | TARGET-20-PADYIR-09A-01R |
| TARGET.21.PARLSL.09A.02R | 10473.53895  | high APOBEC3A | TARGET-21-PARLSL-09A-02R.gene.quantification.txt | TARGET-21-PARLSL-09A-02R |
| TARGET.21.PASFHK.09A.01R | 10559.84563  | high APOBEC3A | TARGET-21-PASFHK-09A-01R.gene.quantification.txt | TARGET-21-PASFHK-09A-01R |
| TARGET.20.PASTUH.03A.01R | 11295.46525  | high APOBEC3A | TARGET-20-PASTUH-03A-01R.gene.quantification.txt | TARGET-20-PASTUH-03A-01R |
| TARGET.21.PAMYMA.09A.02R | 11809.34059  | high APOBEC3A | TARGET-21-PAMYMA-09A-02R.gene.quantification.txt | TARGET-21-PAMYMA-09A-02R |
| TARGET.21.PARNAW.09A.01R | 11970.63145  | high APOBEC3A | TARGET-21-PARNAW-09A-01R.gene.quantification.txt | TARGET-21-PARNAW-09A-01R |
| TARGET.21.PATKWH.09A.01R | 14119.24173  | high APOBEC3A | TARGET-21-PATKWH-09A-01R.gene.quantification.txt | TARGET-21-PATKWH-09A-01R |
| TARGET.20.PARUBT.09A.02R | 14447.34446  | high APOBEC3A | TARGET-20-PARUBT-09A-02R.gene.quantification.txt | TARGET-20-PARUBT-09A-02R |
| TARGET.20.PAPUNR.09A.02R | 14579.71166  | high APOBEC3A | TARGET-20-PAPUNR-09A-02R.gene.quantification.txt | TARGET-20-PAPUNR-09A-02R |
| TARGET.21.PASNKZ.09A.01R | 14787.64133  | high APOBEC3A | TARGET-21-PASNKZ-09A-01R.gene.quantification.txt | TARGET-21-PASNKZ-09A-01R |
| TARGET.20.PATGAN.03A.01R | 18511.40644  | high APOBEC3A | TARGET-20-PATGAN-03A-01R.gene.quantification.txt | TARGET-20-PATGAN-03A-01R |
| TARGET.21.PASDKZ.03A.02R | 36010.85704  | high APOBEC3A | TARGET-21-PASDKZ-03A-02R.gene.quantification.txt | TARGET-21-PASDKZ-03A-02R |
| TARGET.20.PAPVCN.09A.03R | 40996.12754  | high APOBEC3A | TARGET-20-PAPVCN-09A-03R.gene.quantification.txt | TARGET-20-PAPVCN-09A-03R |
